# Supplementary material for: Long-Term Systemic Expression of a Novel PD-1 Blocking Nanobody from an AAV Vector Provides Antitumor Activity without Toxicity
Source: PubMed Central journal article supplement (PMC7761623; doi:10.3390/biomedicines8120562), 2020-12-02
Supplement: biomedicines-08-00562-s001.pdf [file biomedicines-08-00562-s001.pdf]

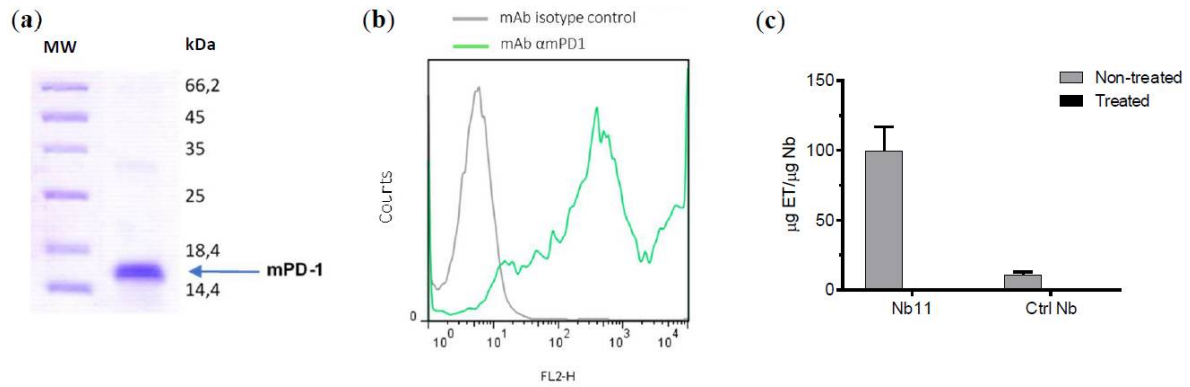

**Supplementary figure 1.** Quality assessment of recombinant mPD-1, HEK-293T/mPD-1+ cells and recombinant endotoxin-free Nbs. **(a)** Coomassie staining analysis of mPD-1 purified from *E. coli*, used for llama immunization. **(b)** Flow-cytometry analysis of mPD-1 expression on transiently transfected HEK-293T cells used as substrate for bio-panning, using a commercial anti-PD1 mAb ( $\alpha\text{mPD1}$ ). **(c)** Analysis of endotoxin (ET) presence in Nbs expressed from *E. coli*, before and after treatment with ET removal columns. No ET contamination was detected in treated samples.

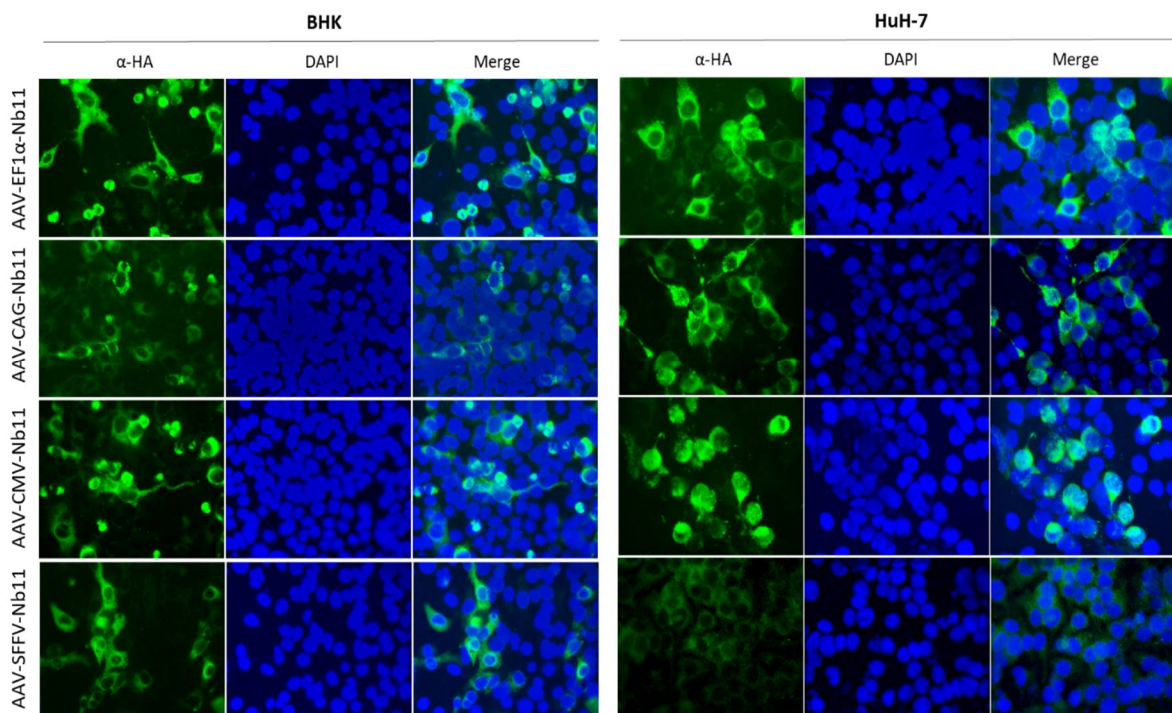

**Supplementary figure 2.** Immunofluorescence staining of BHK and HuH-7 cells transfected with AAV-Nb11 plasmids. 48 h post-transfection, cells were fixed with methanol and an indirect immunofluorescence was performed using an anti-HA primary antibody and a secondary antibody fused to Alexa Fluor 488. Cell nuclei were stained using mounting medium with DAPI. Cells were visualized in a Nikon Eclipse E800 microscope.

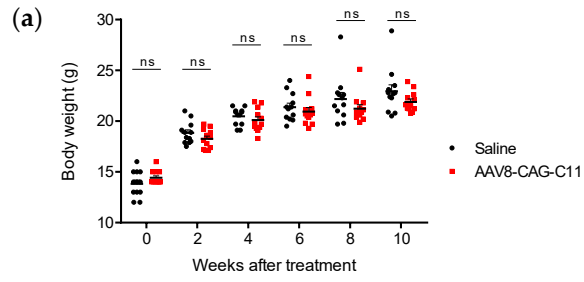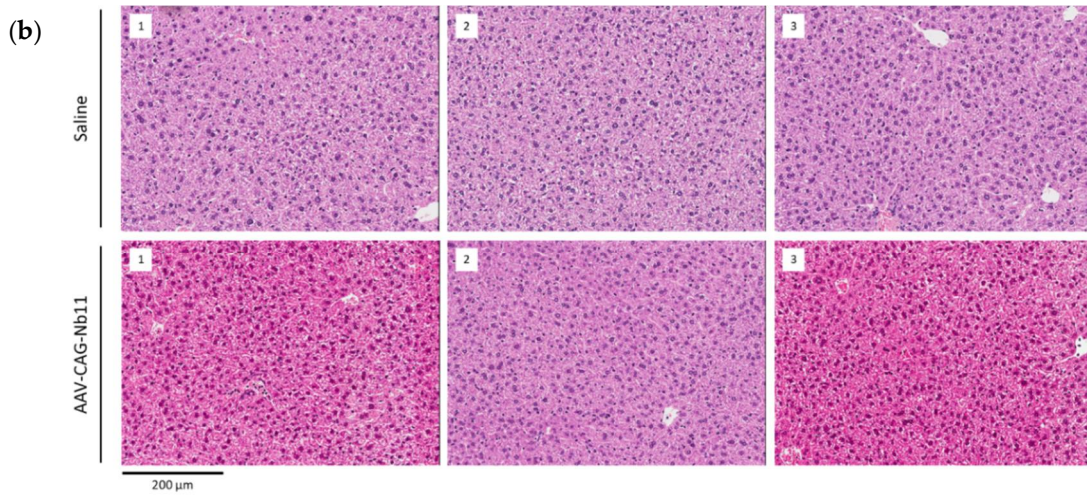

**Supplementary figure 3.** Evaluation of toxicity of AAV-CAG-Nb11 treatment in mice. (a) Body weight gain in mice that received AAV8-CAG-C11 systemically or saline. (b) Hematoxylin and eosin stain of liver sections of treated mice or saline. Livers were collected during animal sacrifice, from three to six weeks after tumor challenge. Each image corresponds to a different animal.
